# Supplementary material for: 8-Hydroxyeicosapentaenoic Acid Decreases Plasma and Hepatic Triglycerides via Activation of Peroxisome Proliferator-Activated Receptor Alpha in High-Fat Diet-Induced Obese Mice
Source: Hindawi journal article supplement (doi:10.1155/2016/7498508), 2016-01-01
Supplement: f1 [file 7498508.f1.pdf]

## **Supplemental Material**

### **Measurement of 8-HEPE in plasma**

Blood plasma was mixed with acetonitrile in 1M acetic acid (ratio, 1:3). The samples were centrifuged and the supernatants collected. The supernatants were concentrated on a MonoSpin C18 column (GL Science Inc.). The extraction efficiency is  $92 \pm 4.3$  %. 8-HEPE and EPA were separated on an InertSustain ODS-3 column (2.0 mm dia.  $\times$  250 mm; GL Science Inc.) with gradient elution (acetonitrile/water/formic acid, 30/70/0.1 to 90/10/0.1 in 30 min) at a flow rate of 0.2 mL/min. The compounds were identified and quantified by liquid chromatography-time of flight mass spectrometry (LC-TOFMS) (Agilent Technologies) using Agilent Mass Hunter Workstation Software (Agilent Technologies).

Supplemental Table 1

|                        | HFD-60<br>(High-fat diet) | AIN-93M<br>(Low-fat diet) |
|------------------------|---------------------------|---------------------------|
|                        | (g / kg diet)             |                           |
| Casein                 | 200                       | 140                       |
| L-cystine              | 3.6                       | 1.8                       |
| Mart-Dextrin           | 60                        | -                         |
| Cornstarch             | -                         | 465.692                   |
| Alfarized cornstarch   | 160                       | 155                       |
| Sucrose                | 55                        | 100                       |
| Soybean oil            | 20                        | 40                        |
| Lard                   | 330                       | -                         |
| Cellulose              | 66.1                      | 50                        |
| AIN-93 mineral mixture | 35                        | 35                        |
| AIN-93 vitamin mixture | 10                        | 10                        |
| Calcium carbonate      | 1.8                       | -                         |
| Choline bitartrate     | 2.5                       | 2.5                       |
| Tert-butylhydroquinone | -                         | 0.008                     |

Supplemental Table 1. Compositions of the diets.

Supplemental Table 2

| Symbol         | Organism     | Description                                                        | Ref seq DNA ID | Real-time PCR primers     |
|----------------|--------------|--------------------------------------------------------------------|----------------|---------------------------|
| <i>Actb</i>    | Mus musculus | beta actin                                                         | NM_007393      | TGGAATCCTGTGGCATCCATGAAAC |
|                |              |                                                                    |                | TAAAACGCAGCTCAGTAACAGTCCG |
| <i>Fabp1</i>   | Mus musculus | Fatty acid binding protein 1, liver                                | NM_017399      | GTGGTCCGCAATGAGTTCAC      |
|                |              |                                                                    |                | CACCTTCCAGCTTGACGACT      |
| <i>Cyp4a10</i> | Mus musculus | cytochrome P450, family 4, subfamily a, polypeptide 10             | NM_010011      | TTCCAGCAGTTCCCATCACC      |
|                |              |                                                                    |                | CTTGCTTCCCAGAACCATCT      |
| <i>Ehhadh</i>  | Mus musculus | Enoyl-Coenzyme A, hydratase/3-hydroxyacyl Coenzyme A dehydrogenase | NM_023737      | GGCTAGAGCCCTGCAGTACGC     |
|                |              |                                                                    |                | CGATGCCTCGGCCATCGTTC      |
| <i>Cpt1a</i>   | Mus musculus | Carnitine palmitoyltransferase 1a, liver                           | NM_013495      | TGGACCCCTCCCTGGGCATG      |
|                |              |                                                                    |                | ATCGCCACCCAGAGCCCTGT      |
| <i>Cpt2</i>    | Mus musculus | Carnitine palmitoyltransferase 2                                   | NM_009949      | CAGTGTGGGCGAGCTTCAGC      |
|                |              |                                                                    |                | TCAGGCAGGGTGACCCCTCT      |
| <i>Fabp4</i>   | Mus musculus | Fatty acid binding protein 4, adipocyte                            | NM_024406      | GATGCCTTTGTGGGAACCT       |
|                |              |                                                                    |                | CTGTGCTCTGCGGTGATTT       |
| <i>Pparg</i>   | Mus musculus | Peroxisome proliferator activated receptor gamma                   | NM_0011273301  | TGCCTTCGCTGATGCACTGCC     |
|                |              |                                                                    |                | CACGGAGAGGTCCACAGAGCTGA   |
| <i>Cepba</i>   | Mus musculus | CCAAT/enhancer binding protein, alpha                              | NM_007678      | CCAACCCCATCCCCAACGGC      |
|                |              |                                                                    |                | GAAGCGGTCCAGCCCTGCTC      |
| <i>Adipoq</i>  | Mus musculus | Adiponectin                                                        | NM_009605      | GCACTGGCAAGTTCTACTGCAA    |
|                |              |                                                                    |                | GTAGGTGAAGAGAACGGCCTTGT   |
| <i>Srebf1</i>  | Mus musculus | Sterol regulatory element binding transcription factor 1           | NM_011480      | GGACACAGCGGTTTTGAACG      |
|                |              |                                                                    |                | CTCAGGAGAGTTGGCACCTG      |
| <i>Fasn</i>    | Mus musculus | Fatty acid synthase                                                | NM_007988      | ATCTCTCCAAGTTCGACGCC      |
|                |              |                                                                    |                | GTTCTGTTCTCGGAGTGAGG      |
| <i>Lpin2</i>   | Mus musculus | Lipin 2                                                            | NM_001164885   | TGCTTTACCTAGAAGATAACAGTGA |
|                |              |                                                                    |                | CCAGCTGGCCCACATAATTC      |
| <i>St3gal5</i> | Mus musculus | ST3 beta-galactoside alpha-2,3-sialyltransferase 5                 | NM_001035228   | CAATGGTACACCCGAACCCA      |
|                |              |                                                                    |                | AGGAGCCAGACTCCAAATGC      |

|                |                 |                     |           |                       |
|----------------|-----------------|---------------------|-----------|-----------------------|
| <i>Angptl4</i> | Mus<br>musculus | Angiopoietin-like 4 | NM_020581 | ACTTGGGACCAAGACCATGAC |
|                |                 |                     |           | TACAGGTACCAAACCACCAGC |

Supplemental Table 2. Primers for real-time PCR

Supplemental Table 3

| Mice Groups     | 8-HEPE    |
|-----------------|-----------|
| HFD             | n.d.      |
| HFD with EPA    | n.d.      |
| HFD with 8-HEPE | 3.7 ± 1.9 |

Supplemental Table 3. Concentration (nM) of 8-HEPE in male C57BL/6J-DIO mice fed HFD, HFD with EPA, or HFD with 8-HEPE for 4 wk. Values are means ± SDs, n = 9. Means at a time without a common letter differ, P < 0.05. HFD, High fat diet; HEPE, hydroxyeicosapentaenoic acid; EPA, eicosapentaenoic acid;

Supplemental Table 4

|                 | Plasma adiponectin<br>( $\mu\text{g} / \text{mL}$ ) | Plasma leptin<br>( $\text{ng} / \text{mL}$ ) |
|-----------------|-----------------------------------------------------|----------------------------------------------|
| HFD             | $26.53 \pm 3.09$                                    | $41.25 \pm 10.63$                            |
| HFD with EPA    | $27.45 \pm 3.61$                                    | $40.17 \pm 14.89$                            |
| HFD with 8-HEPE | $26.51 \pm 2.58$                                    | $35.79 \pm 7.07$                             |

Supplemental Table 4. Concentrations of plasma adiponectin and leptin in male C57BL/6J-DIO mice fed HFD, HFD with EPA or HFD with 8-HEPE for 4 wk. Values are means  $\pm$  SDs, n = 9. HFD, high fat diet; HEPE, hydroxyeicosapentaenoic acid; EPA, eicosapentaenic acid;

Supplemental Fig. 1

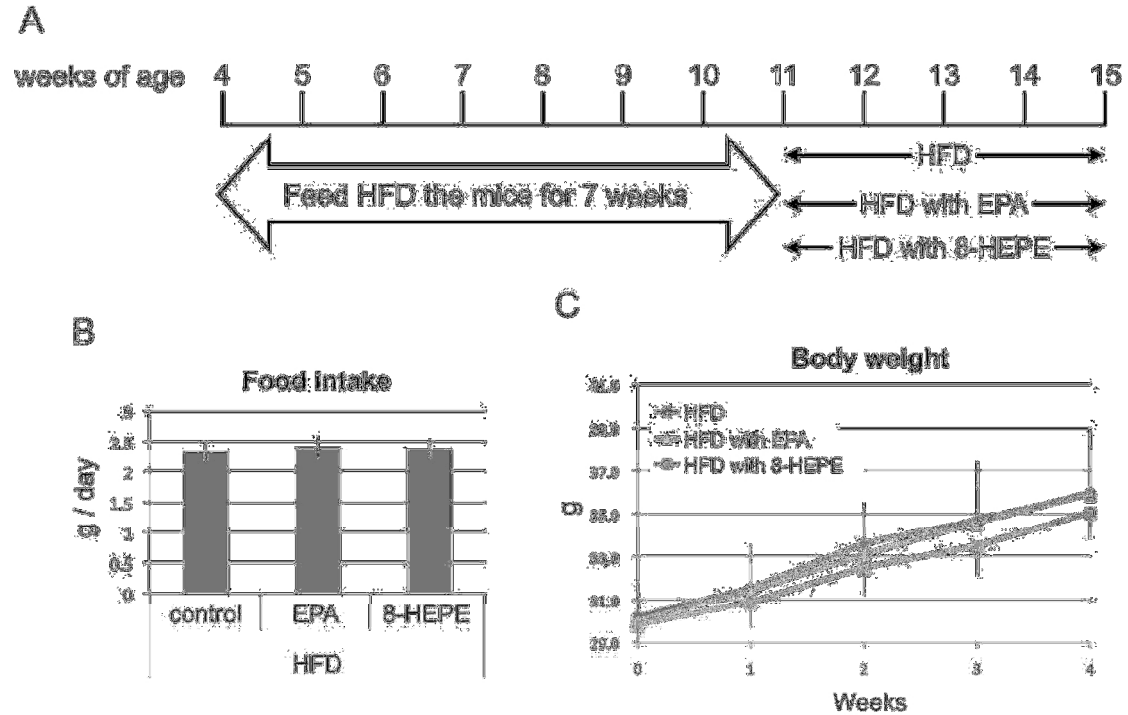

Supplemental Figure 1. Experimental design (A), food intake (B) and body weight gain (C) in male C57BL/6J-DIO mice fed HFD, HFD with EPA, or HFD with 8-HEPE for 4wk. Values are means  $\pm$  SDs,  $n = 9$ . HFD, High fat diet; HEPE, hydroxyeicosapentaenoic acid; EPA, eicosapentaenic acid;

Supplemental Fig. 2

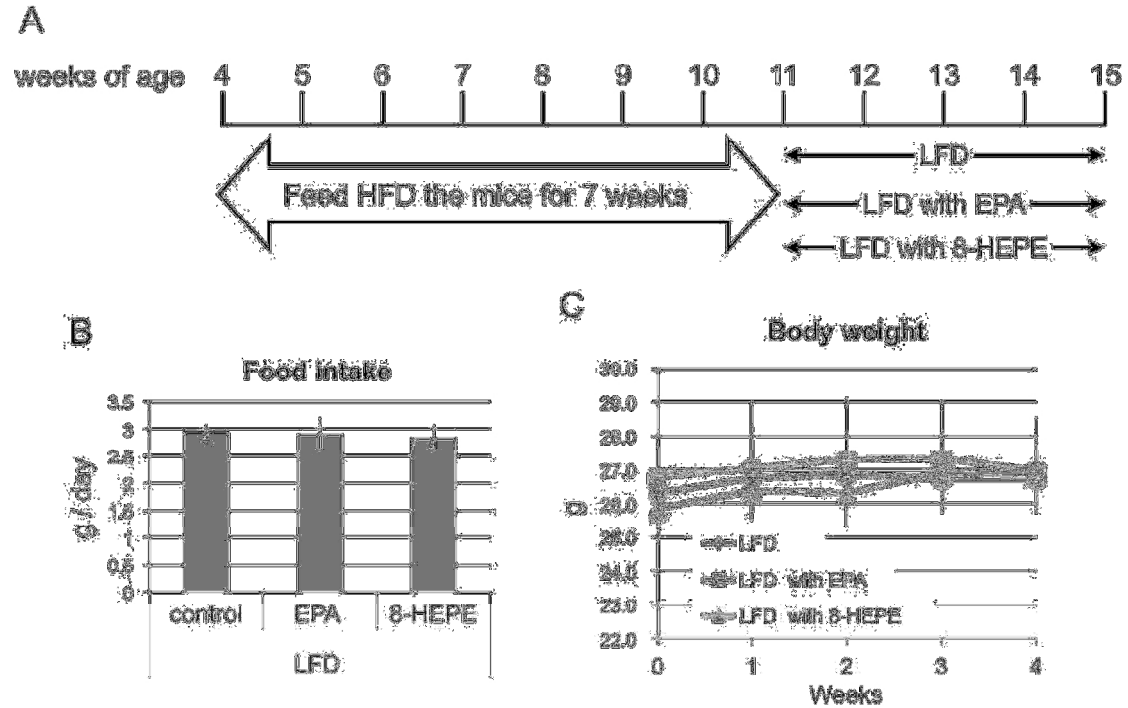

Supplemental Figure 2. Experimental design (A), food intake (B) and body weight gain (C) in male C57BL/6J-DIO mice fed LFD, LFD with EPA, or LFD with 8-HEPE for 4wk. Values are means  $\pm$  SDs, n = 9. LFD, Low fat diet; HEPE, hydroxyeicosapentaenoic acid; EPA, eicosapentaenoic acid;



Supplemental Fig. 3

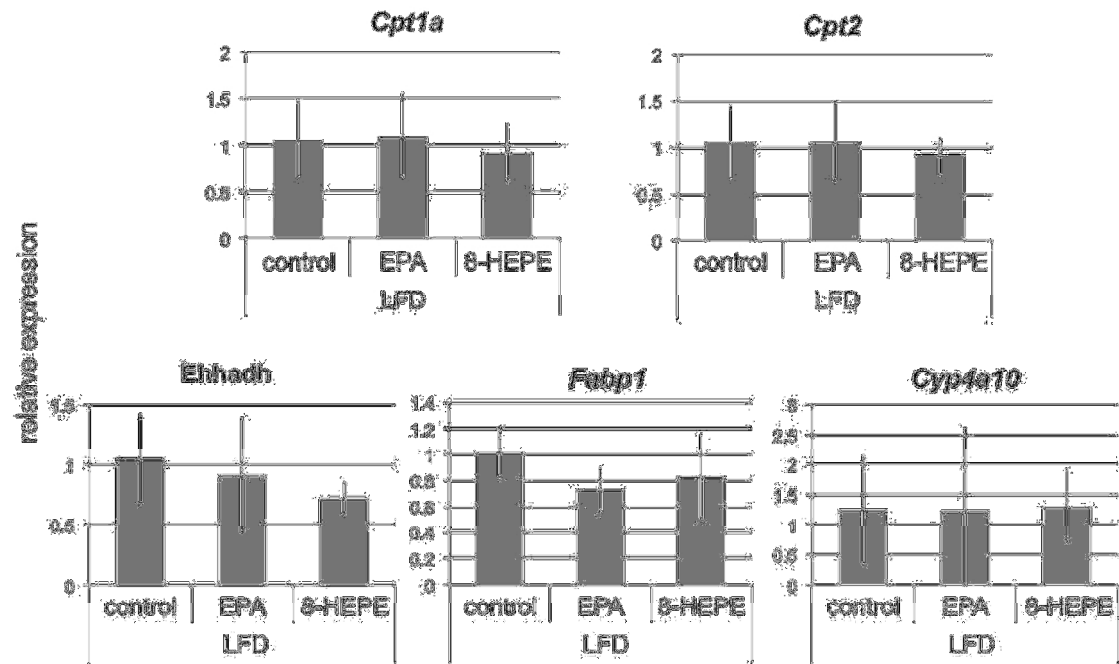

Supplemental Figure 3. Hepatic gene expression changes in male C57BL/6J-DIO mice fed LFD, LFD with EPA, or LFD with 8-HEPE for 4wk. Gene expression levels were measured by real-time PCR and normalized against expression of *Actb*. Values are means  $\pm$  SDs, n = 9. LFD, Low fat diet; HEPE, hydroxyeicosapentaenoic acid; EPA, eicosapentaenoic acid;

Supplemental Fig. 4

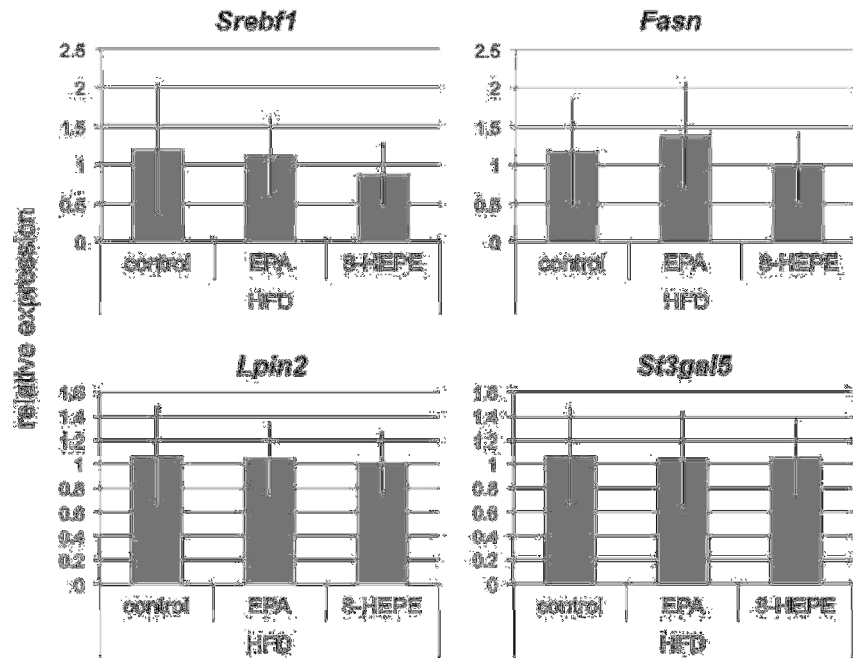

Supplemental Figure 4. Hepatic gene expression changes in male C57BL/6J-DIO mice fed HFD, HFD with EPA, or HFD with 8-HEPE for 4wk. Gene expression levels were measured by real-time PCR and normalized against expression of *Actb*. Values are means  $\pm$  SDs, n = 10. HFD, High fat diet; HEPE, hydroxyeicosapentaenoic acid; EPA, eicosapentaenoic acid;

Supplemental Figure 5

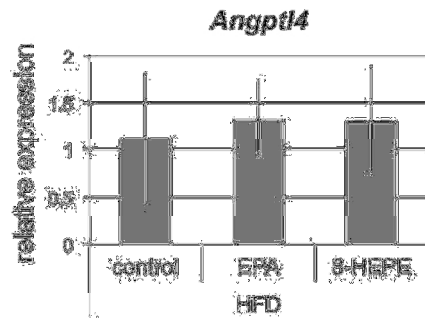

Supplemental Figure 5. Muscle *Angptl4* gene expression change in male C57BL/6J-DIO mice fed HFD, HFD with EPA, or HFD with 8-HEPE for 4wk. Gene expression levels were measured by real-time PCR and normalized against expression of *Actb*. Values are means  $\pm$  SDs,  $n = 10$ . HFD, High fat diet; HEPE, hydroxyecosapentaenoic acid; EPA, eicosapentaenic acid;
